# Supplementary material for: Clinical Characteristics of Individuals With Serious Mental Illness and Type 2 Diabetes
Source: Atypon-hosted journal article supplement (doi:10.1176/appi.ps.201300538), 2014-12-17
Supplement: appi.ps.201300538.ds001.pdf [file appi.ps.201300538.ds001.pdf]

**On-line Appendix:**

Data Supplement for Sajatovic et al. (10.1176/appi.ps.201300538)

**Clinical characteristics of individuals with serious mental illness (schizophrenia, bipolar disorder, major depression) and comorbid diabetes**

| Variable                          | All individuals<br>(N=157) |                | Schizophrenia<br>(N=40) |      | Bipolar Disorder<br>(N=40) |       | Depression<br>(N=77) |      | Statistic<br>K-W |
|-----------------------------------|----------------------------|----------------|-------------------------|------|----------------------------|-------|----------------------|------|------------------|
|                                   | N                          | % <sup>a</sup> | N                       | %    | N                          | %     | N                    | %    | p                |
| Age (M±SD)                        | 52.9±9.8                   |                | 51.9±8.9                |      | 52.1±10.8                  |       | 53.8±9.7             |      | .4134            |
| Gender Female                     | 102                        | 65.0           | 21                      | 52.5 | 26                         | 65.0  | 55                   | 71.4 | .1259            |
| Race                              |                            |                |                         |      |                            |       |                      |      | .0043            |
| Caucasian                         | 80                         | 51.0           | 31                      | 77.5 | 17                         | 42.56 | 32                   | 42.5 |                  |
| African-American                  | 62                         | 39.5           | 7                       | 17.5 | 18                         | 45.0  | 37                   | 45.0 |                  |
| Other                             | 15                         | 9.6            | 2                       | 5.0  | 5                          | 12.5  | 8                    | 12.5 |                  |
| Hispanic                          | 14                         | 8.9            | 2                       | 5.0  | 5                          | 12.5  | 7                    | 9.1  | .4989            |
| Education (M±SD)                  | 12.6±2.6                   |                | 11.9±2.7                |      | 12.9±2.9                   |       | 12.8±2.4             |      | .2647            |
| Health Insurance                  |                            |                |                         |      |                            |       |                      |      | .1964            |
| Private                           | 4                          | 2.6            | 0                       | 0    | 1                          | 2.5   | 3                    | 3.9  |                  |
| Medicare                          | 50                         | 31.9           | 18                      | 45.0 | 12                         | 30.0  | 20                   | 26.0 |                  |
| Medicaid                          | 80                         | 52.2           | 21                      | 52.5 | 22                         | 55.0  | 39                   | 50.6 |                  |
| Other/none                        | 21                         | 13.3           | 1                       | 2.5  | 5                          | 12.5  | 15                   | 19.5 |                  |
| DM duration (M±SD)                | 10.4±7.8                   |                | 8.9±6.5                 |      | 8.3±7.7                    |       | 12.2±8.6             |      | .0125            |
| SMI duration (M±SD)               | 18.1±12.2                  |                | 22.1±11.9               |      | 17.3±12.7                  |       | 16.4±12.0            |      | .0438            |
| Insulin user                      | 79                         | 51.3           | 16                      | 40.0 | 23                         | 59.0  | 40                   | 53.3 | .2135            |
| Charlson Index (M±SD)             | 2.1±1.6                    |                | 2.1±1.6                 |      | 2.5±1.6                    |       | 2.0±1.5              |      | .2857            |
| BMI (M±SD)                        | 36.2±8.9                   |                | 33.8±7.1                |      | 35.9±9.4                   |       | 37.6±9.6             |      | .1864            |
| HgbA1c (M±SD)                     | 8.1±2.4                    |                | 7.5±2.7                 |      | 7.7±2.0                    |       | 8.5±2.4              |      | .0130            |
| BPRS <sup>b</sup> (M±SD)          | 39.4±9.1                   |                | 44.8±8.9                |      | 36.0±10.0                  |       | 37.9±8.7             |      | <.0001           |
| MADRS <sup>c</sup> (M±SD)         | 23.9±9.2                   |                | 23.2±10.6               |      | 21.7±9.1                   |       | 25.5±8.5             |      | .0930            |
| CGI <sup>d</sup> (M±SD)           | 4.3±.9                     |                | 4.7±.8                  |      | 3.9±.9                     |       | 4.2±.9               |      | .0005            |
| GAF <sup>e</sup> (M±SD)           | 52.0±11.1                  |                | 47.1±11.3               |      | 56.0±12.4                  |       | 52.5±10.3            |      | .0020            |
| Sheehan Disability (M±SD)         | 17.3±6.3                   |                | 17.4±6.1                |      | 16.3±7.6                   |       | 17.8±5.8             |      | .6621            |
| Diabetes Knowledge (M±SD)         | 66.7±19.5                  |                | 59.0±19.7               |      | 67.0±18.8                  |       | 70.6±19.9            |      | .0081            |
| MSPSS <sup>f</sup> (M±SD)         | 41.8±9.8                   |                | 43.2±9.8                |      | 42.7±8.1                   |       | 40.7±10.7            |      | .4721            |
| ITAQ <sup>g</sup> (M±SD)          | 17.8±5.0                   |                | 20.1±3.9                |      | 17.5±6.2                   |       | 16.8±5.1             |      | .0008            |
| TRQ <sup>h</sup> past week (M±SD) | 17.9±30.3                  |                | 13.6±28.1               |      | 16.4±25.7                  |       | 21.1±34.0            |      | .3896            |
| CAGE <sup>i</sup> (M±SD)          | .8±1.4                     |                | .9±1.6                  |      | 1.3±1.7                    |       | .4±1.1               |      | .0033            |
| DAST-10 <sup>j</sup> (M±SD)       | .6±1.6                     |                | 1.3±2.6                 |      | .7±2.2                     |       | .2±.9                |      | .0552            |

<sup>a</sup> Percentages may slightly exceed 100% as decimal places were rounded up

<sup>b</sup>BPRS= Brief Psychiatry Rating Scale: Overall JE, Gorham DR: The brief psychiatric rating scale. Psychological Reports 10:799-812, 1962.

<sup>c</sup>MADRS = Montgomery Asberg Depression Rating Scale: Montgomery SA, Asberg M: A new depression scale designed to be sensitive to change. The British Journal of Psychiatry : The Journal of Mental Science 134:382-389, 1979.

<sup>d</sup>CGI = Clinical Global Impressions: Guy W: ECDEU Assessment Manual for Psychopharmacology. Rockville, MD, U.S. Department of Health, Education, and Welfare, 1979.

- <sup>e</sup>GAF= Global Assessment of Functioning: Jones SH, Thornicroft G, Coffey M, et al: A brief mental health outcome scale-reliability and validity of the Global Assessment of Functioning (GAF). *The British Journal of Psychiatry : The Journal of Mental Science* 166:654-659, 1995.
- <sup>f</sup>MSPSS=Multidimensional Scale of Perceived Social Support: Zimet GD, Powell SS, Farley GK, et al: Psychometric characteristics of the Multidimensional Scale of Perceived Social Support. *Journal of Personality Assessment* 55:610-617, 1990.
- <sup>g</sup>ITAQ=Insight and Treatment Attitudes Questionnaire: McEvoy JP, Aland J, Jr., Wilson WH, et al: Measuring chronic schizophrenic patients attitudes toward their illness and treatment. *Hospital & Community Psychiatry* 32:856-858, 1981.
- <sup>h</sup>TRQ= Tablets Routine Questionnaire: Peet M, Harvey NS: Lithium maintenance: 1. A standard education programme for patients. *The British Journal of Psychiatry : The Journal of Mental Science* 158:197-200, 1991.
- <sup>i</sup>CAGE= standardized measure to assess problem drinking: Ewing JA: Detecting alcoholism. The CAGE questionnaire. *JAMA : The Journal of the American Medical Association* 252:1905-1907, 1984.
- <sup>j</sup>DAST-10=Drug Abuse Screening Test 10-item version: Skinner HA: The drug abuse screening test. *Addictive Behaviors* 7:363-371, 1982.
